# Supplementary material for: A Method to Summarize Toxicity in Cancer Randomized Clinical Trials
Source: Oxford University Press journal article supplement (doi:10.1158/1078-0432.ccr-17-3314), 2018-05-08
Supplement: 10780432ccr173314-sup-192015_3_supp_4719436_p74344.xls [file 10780432ccr173314-sup-192015_3_supp_4719436_p74344.xls]

## Sheet: ALL STUDIES
STUDY INDEX #	1st AUTHOR	Short Title	Disease	Publication Year	PMID	# PTS Expt	#PTS Ctrl	Minimum cutoff for toxicity reporting (%)	# toxicity items listed	Reporting of toxicity by grade	p values calc for toxicity difference	Placebo controlled study?	Study selected for analysis with complete data	Reason for EXCLUSION from the initial analysis
1	O'Brien	IRIS: Imatinib vs IFN-alfa/LoDAC in CML	CML	2003	12637609	553	553	0.1	42	Any, G3+4	N	NO	NO	Compared TKI to chemotherapy
2	Shepherd	EURTAC: Erlotinib vs placebo in EGFRmut(+) NSCLC	EGFRmut(+) NSCLC	2005	16014882	485	242	MC	12	Any, G3-5	Y	YES	YES
3	Thatcher	ISEL: Gefitinib v placebo in NSCLC	NSCLC	2005	16257339	1129	563	5% or difference betw arms > 3%	18	Any, G3+4	N	YES	NO	No data on frequency of dose reductions on either arm
4	Geyer	Lapatinib/capecitabine vs capecitabine	HER2(+) BRCA	2006	17192538	163	161	MC	18	G1, G2, G3, G4	Y	NO	NO	Compared TKI to chemotherapy
5	Demetri	Sunitinib v placebo in GIST	GIST	2006	17046465	207	105	0.05	23	G1+2, G3, G4	N	YES	YES
6	Motzer	Sunitinib vs IFN-alfa in RCC	RCC	2007	17215529	375	375	0.1	36	Any, G3, G4	N	NO	NO	Compared TKI to immunotherapy
7	Moore	Erlotinib-Gemcitabine vs Gem in Panc CA	Panc CA	2007	17452677	285	284	MC	9	Any, G3+4	N	NO	NO	Compared TKI to chemotherapy
8	Hudes	Temsirolimus, IFN-alfa, or both in RCC (only examined monotherapy)	RCC	2007	17538086	209	207	0.2	28	Any, G3+4	N	NO	NO	Compared TKI to immunotherapy
9	LLovet	Sorafenib v placebo in HCC	HCC	2008	18650514	297	302	0.05	17	Any, G3, G4	Y	YES	YES
10	Motzer	Everolimus v placebo in RCC	RCC	2008	18653228	269	135	0.1	28	Any, G3, G4	Y	YES	YES
11	Kim	INTEREST: Gefitinib v docetaxel in NSCNC	NSCLC	2008	19027483	733	733	MC	20	Any, G3+4	Y	NO	NO	Compared TKI to chemotherapy
12	DeMatteo	Imatinib 1 v 0 adj for primary GIST	GIST (primary)	2009	19303137	345	337	MC	14	G1, G2, G3, G4	N	YES	YES	Included data on dose reduction + interruption
13	Escudier	Sorafenib v placebo in RCC	RCC	2009	19451442	451	451	0.05	19	Any, G3, G4	N	YES	YES	Included data on dose reduction + interruption
14	Johnston	Lapatinib/Letrozole vs Letrozole-placebo	ER(+) BRCA	2009	19786658	478	474	MC	20	G1, G2, G3, G4	Y	NO	NO	Compared TKI/hormonal Rx combo to hormonal Rx
15	Cappuzzo	SATURN: Erlotinib maintenance in NSCLC	NSCLC	2010	20493771	433	445	0.05	6	Any, G3-5	N	YES	YES
16a	Saglio	ENESTnd: Nilotinib (400) vs imatinib in CML	CML	2010	20525993	281	283	0.1	25	Any, G3+4	N	NO	NO	Compared two TKIs
16b	Saglio	ENESTnd: Nilotinib (300) vs imatinib in CML	CML	2010	20525993	282	283	0.1	25	Any, G3+4	N	NO	NO	Compared two TKIs
17	Kantarjian	Dasatinib vs Imatinib in CML	CML initial Rx	2010	20525995	259	260	0.1	15	Any, G3+4	N	NO	NO	Compared two TKIs
18	Raymond	Sunitinib v placebo in PancNET	PancNET	2011	21306237	83	82	0.15	22	Any, G1+2, G3+4	N	YES	YES
19	Yao	RADIANT3: Everolimus vs placebo for PancNET	PancNET	2011	21306238	204	203	0.1	23	Any, G3+4	N	YES	YES
20	Chapman	BRIM3: Vemurafenib v DTIC in BRAF mut melanoma	Mel (BRAF)	2011	21639808	337	338	0.05	14	G2, G3, G4, G5	N	NO	NO	Compared TKI to chemotherapy
21	Rini	AXIS: axitinib v sorafenib in RCC	RCC	2011	22056247	361	362	MC	28	Any, ≥G3	N	YES	NO	Compared two TKIs
22	Wells	Vandetanib v placebo in MTC	MTC	2012	22025146	231	99	10% or G3+>2%	22	All>10%, G3>2%	N	YES	YES
23	Ledermann	Olaparib maintenance in ovarian cancer	Ovarian	2012	22452356	136	128	0.1	20	Any, G1, G2, G3+4	N	YES	YES
24	Joensuu	Imatinib 3 vs 1 adj for primary GIST	GIST (primary)	2012	22453568	200	200	MC	10	Any, G3+4	Y	NO	NO	Same TKI used in both arms of trial
25	van der Graaf	PALETTE: Pazopanib v placebo in STS	STS	2012	22595799	239	123	MC	15	Any, G3, G4	N	YES	YES
26	Flaherty	Trametinib v chemotherapy in BRAF Mutant melanoma	Mel (BRAF)	2012	22663011	214	108	0.15	10	Any, G2, G3+4	N	NO	NO	Compared TKI to chemotherapy
27	Hauschild	Dabrafenib vs DTIC in BRAF mut melanoma	Mel (BRAF)	2012	22735384	187	63	0.05	13	G2, G3, G4, G5	N	NO	NO	Compared TKI to chemotherapy
28	Cortes	BELA: Bosutinib v imatinib in new dx CML	CML	2012	22949154	250	252	MC	20	Any, G3+4	N	NO	NO	Agent not approved by FDA or EMA
29	Lee	Erlotinib vs placebo 1st line EGFR+ NSCLC	NSCLC	2012	23078958	334	313	Selected Aes	14	Specific G3, G4 events	Y	YES	NO	No data on frequency of dose reductions on either arm
30a	Pritchard	BOLERO2: Evero/Exemestane vs exemestane in HER2(-) ER(+) BRCA	HER2(-) ER(+) BRCA <70	2012, 2013	24267730	364	196	0.1	27	Any, G3, G4	N	NO	NO	Compared TKI/hormonal Rx combo to hormonal Rx
30b	Pritchard	(Subset analysis from primary article PMID 22149876)	HER2(-) ER(+) BRCA ≥70	2012, 2013	24267730	121	43	0.1	27	Any, G3, G4	N	NO	NO	Compared TKI/hormonal Rx combo to hormonal Rx
31	Sternberg	Pazopanib v placebo in RCC	RCC	2013	20100962	290	145	0.1	27	Any, G3, G4	N	YES	NO	No data on frequency of dose reductions on either arm
32	Grothey	CORRECT: regorafenib v placebo in CRC	CRC	2013	23177514	500	253	0.05	27	Any, G3, G4	N	YES	YES	Included data on dose reduction + interruption
33	Demetri	GRID: regorafenib v placebo in GIST	GIST	2013	23177515	132	66	0.1	13	Any, G3, G4	N	YES	YES	Included data on dose reduction + interruption
34	Demetri	SUCCEED: Ridaforolimus v placebo in STS	STS	2013	23715582	347	364	20% or G3+>3%	18	Any, ≥G3	N	NO	NO	Agent not approved by FDA or EMA
35	Motzer	Pazopanib v sunitinib in RCC	RCC	2013	23964934	554	548	0.1	37	Any, G3, G4	N	NO	NO	Compared two TKIs
36	Elisei	Cabozantinib v placebo in MTC	MTC	2013	24002501	214	109	0.1	36	Any, ≥G3	N	YES	YES
37	Kang	RIGHT: Imatinib v placebo after failure of other TKI in GIST	GIST	2013	24140183	41	40	0.1	13	Any, G3+4	N	YES	YES
38	Sequist	LUNGLUX3: Afatinib vs Cis/Pem for EGFRmut NSCLC	EGFRmut(+) NSCLC	2014	23816960	230	115	5% or difference betw arms > 10%	16	Any, ≥G3	N	NO	NO	Compared TKI to chemotherapy
39	Wu	LUNGLUX6: Afatinib vs Cis/Pem for EGFRmut NSCLC	EGFRmut(+) NSCLC	2014	24439929	242	122	G1+2>10% or G3+>1%	24	Any, G1+2, G3, G4, G5	N	NO	NO	Compared TKI to chemotherapy
40	Furman	Idealisib/Rituximab vs Rituximab for CLL	CLL	2014	24450857	110	110	10% or 3 patients with SAE	28	Any, ≥G3	N	NO	NO	Compared TKI/monoclonal antibody combo to monoclonal antibody
41	Brose	DECISION: Sorafenib v placebo in Iodine refractory thyroid CA	Thyroid	2014	24768112	207	209	0.1	30	Any, G3, G4	N	YES	YES
42	Byrd	RESONATE: Ibrutinib vs Ofatumumab in CLL	CLL	2014	24881631	195	196	0.1	30	Any, G3+4	N	NO	NO	Compared TKI to monoclonal antibody
43	du Bois	Pazopanib maintenance for ovarian CA	Ovarian	2014	25225436	477	461	10%, or G3+>1%	11	Any, G3+4	Y	YES	YES
44	San-Miguel	bortezomib + dexameth +/- panobinostat in myeloma	Myeloma	2014	25242045	387	381	0.1	29	G1, G2, G3, G4	N	NO	NO	Combination therapy in both arms
45	Solomon	PROFILE 1014: Crizotinib v platin/pembro in ALK(+) NSCLC	ALK(+) NSCLC	2014	25470694	172	171	0.15	25	Any, G3+4	N	NO	NO	Compared TKI to chemotherapy
46	Stewart	lenalidomide + dexamethasone +/- carfilzomib in myeloma	Myeloma	2015	25482145	396	396	0.2	12	Any, ≥G3	N	NO	NO	Combination therapy in both arms
47	Vannucchi	Ruxolitinib vs SOC for P Vera	P Vera	2015	25629741	110	112	0.1	14	Any, G3+4	N	YES	NO	No data on frequency of dose reductions on either arm
48	Schlumberger	Lenvatinib v placebo in Iodine refractory thyroid CA	Thyroid	2015	25671254	261	131	10% or G3+>2%	26	Any, ≥G3*	N	YES	YES
49	Migden	BOLT: sonidegib in BCC	BCC	2015	25981810	151	79	0.1	32	G1, G2, G3, G4	N	NO	NO	Compared two doses of same agent
50	Turner	PALOMA3: Fulvestrant +/- Palbociclib for ER+ BRCA	ER(+) BRCA	2015	26030518	347	174	0.1	21	Any, G3, G4	N	NO	NO	Compared TKI/hormonal Rx combo to hormonal Rx
51	Demetri	Nilotinib vs Ima first line unresectable met GIST(Enestg1)	GIST	2015	25882987	324	320	0.1	25	Any, G3, G4	N	NO	NO	Agent not approved by FDA or EMA
52	Stewart	Carfilzomib, Lenalidomide dexamethasone for relapsed multiple myeloma.	Myeloma	2015	25482145	396	396	0.25	12	Any, ≥G3	N	NO	NO	Combination therapy in both arms
53	Larkin	Combined Vemurafenib and Cobimetinib in BRAF mutaded Melanoma	Melanoma(BRAF+)	2015	25265494	248	247	0.2	19	G1, G2, G3, G4	N	NO	NO	Combination therapy in one arm
54	Moreau	Ixazomib in combination with Dexa and lenalidomide	Myeloma	2015	NCT01564537	360	362	NA	NA	NA	N	NO	NO	Combination therapy in both arms
55	Long	Dabrafenib and trametinib versus dabrafenib and placebo for Val600 BRAF-mutant melanoma: a multicentre, double-blind, phase 3 randomised controlled trial	Melanoma(BRAF+)	2015	26037941	211	212	≥10%	26	Any, G2, G3	N	NO	NO	Combination therapy
56	Cristofanilli	PALOMA -3 Fulvestrant plus palbociclib versus fulvestrant plus placebo for treatment of hormone-receptor-positive, HER2-	Breast( HER2 - ER pgR +)	2016	26947331	347	174	G1+2 ≥10%	87	G1, G2, G3, G4	N	NO	NO	Compared TKI/hormonal Vs Hormonal/pacebo
57	Choueiri	Cabozantinib v everolimus in advanced RCC	RCC	2016	26406150	331	322	0.1	42	Any, G3, G4	N	NO	NO	Compared two TKIs
58	Motzer	Lenvatinib, Everolimus and combination in RCC	RCC	2016	26482279	52	51	0.1	45	G1, G2, G3, G4	N	NO	NO	Combination therapy; two arms of randomized study shown
											n=	24	19
n=58
Published 2003 - 05/2016 -- FDA approved oral inhibitors for cancer
MC = most common
* With more complete list in appendix
#: dose reduction OR interruption noted
Escudier: no more than two dose reductions or interruptions noted, not indicated in this table.
* hematologic remission
NA = not available
